# Supplementary material for: FeVO4/rGO as high-performance supercapacitor electrode: synthesis and characterization
Source: Research Square preprint supplement (doi:10.21203/rs.3.rs-6991686/v1), 2025-08-08
Supplement: Supplementary file 1 [file 3fbe5cac1abca12e46ad3594.docx]

**FeVO4/rGO as high-performance supercapacitor electrode: synthesis and characterization**

Xiancai zeng1,2 · meng guo1,2 · xin Luo1,2 · Mingjian Zhao1,2 · jingyi ren1,2 · Jiling Tan1,2

1, School of Biological and Chemical Engineering, Nanyang Institute of Technology, Nanyang 473000, China

2, Henan Key Laboratory of Industrial Microbial Resources and Fermentation Technology, Nanyang 473000, China


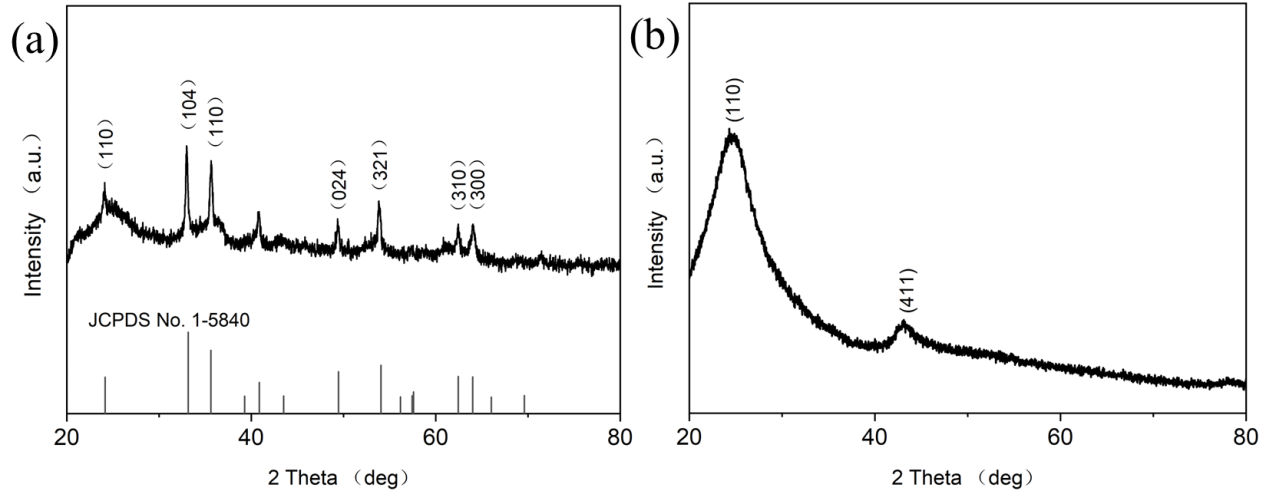


Fig. S1 XRD pattern of (a) Fe2O3/G, and (b) V2O5/G composites





Fig. S2 High-resolution XPS spectrum for O 1s of FeVO4/G-2 composite


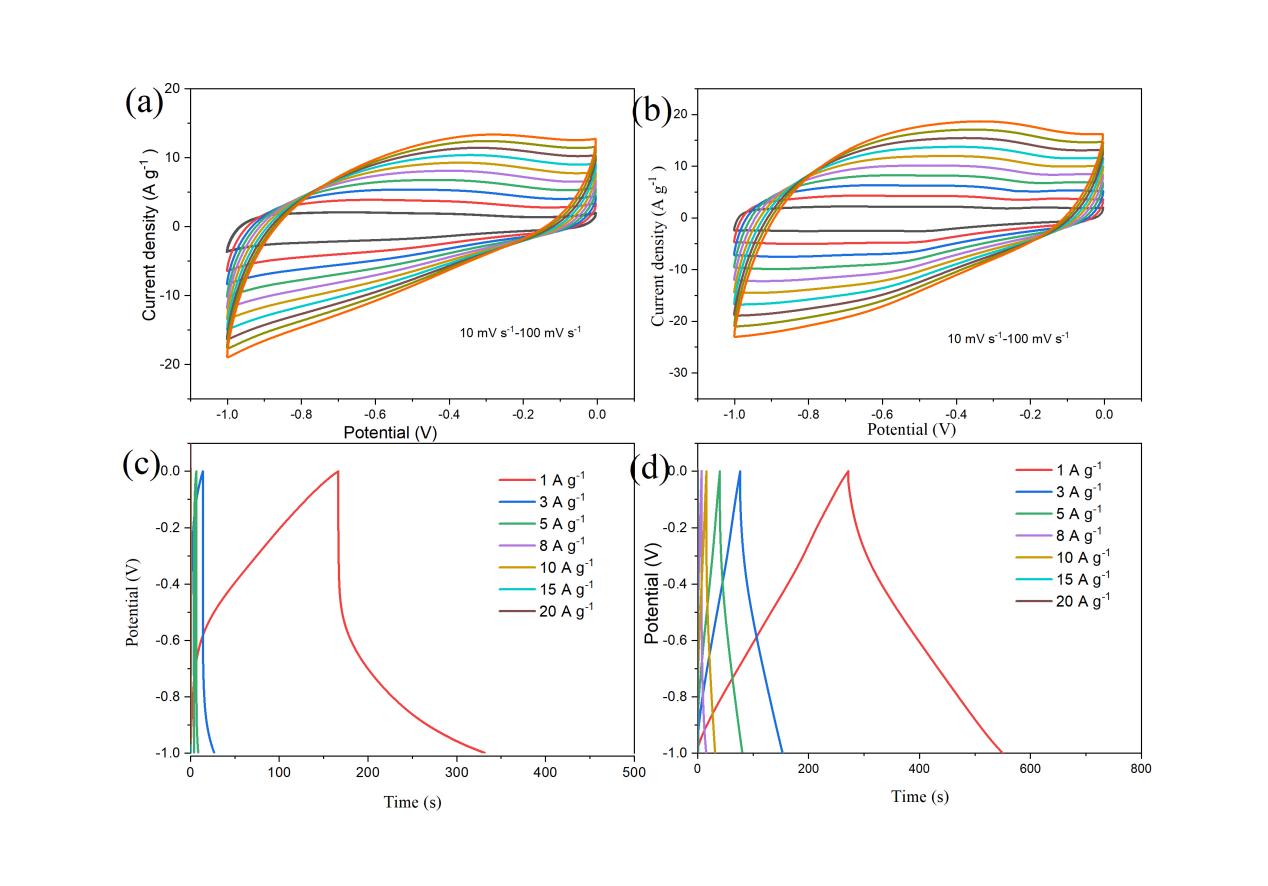


Fig. S3 CV curves at different scan rates of (a) Fe2O3/G, and (b) V2O5/G composites ;GCD curves at various current densities of (c) Fe2O3/G, and (d) V2O5/G composites
